# Supplementary material for: One pot synthesis of thiol-functional nanoparticles
Source: Royal Society of Chemistry journal article supplement (doi:10.1039/d2py01512a), 2023-01-01
Supplement: d2py01512a1.pdf [file d2py01512a1.pdf]

# One pot synthesis of thiol-functional nanoparticles

Aaron Priester<sup>1\*</sup>, Jimmy Yeng<sup>1</sup>, Krista Hilmas<sup>1</sup> and Anthony J. Convertine<sup>1\*</sup>

<sup>1</sup>Missouri University of Science and Technology, Rolla, Missouri 65409

## Supporting Information

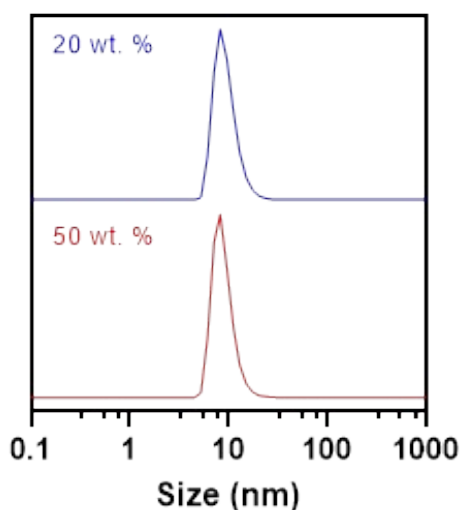

**SI Figure 1.** DLS traces and z-average sizes for PS80-SH nanoparticles before and after concentrating over 60°C heat for 6 hours. As shown, there was little to no change in the number average distribution of particle sizes. A slight increase from 22 to 27 nm in z-average size was observed.

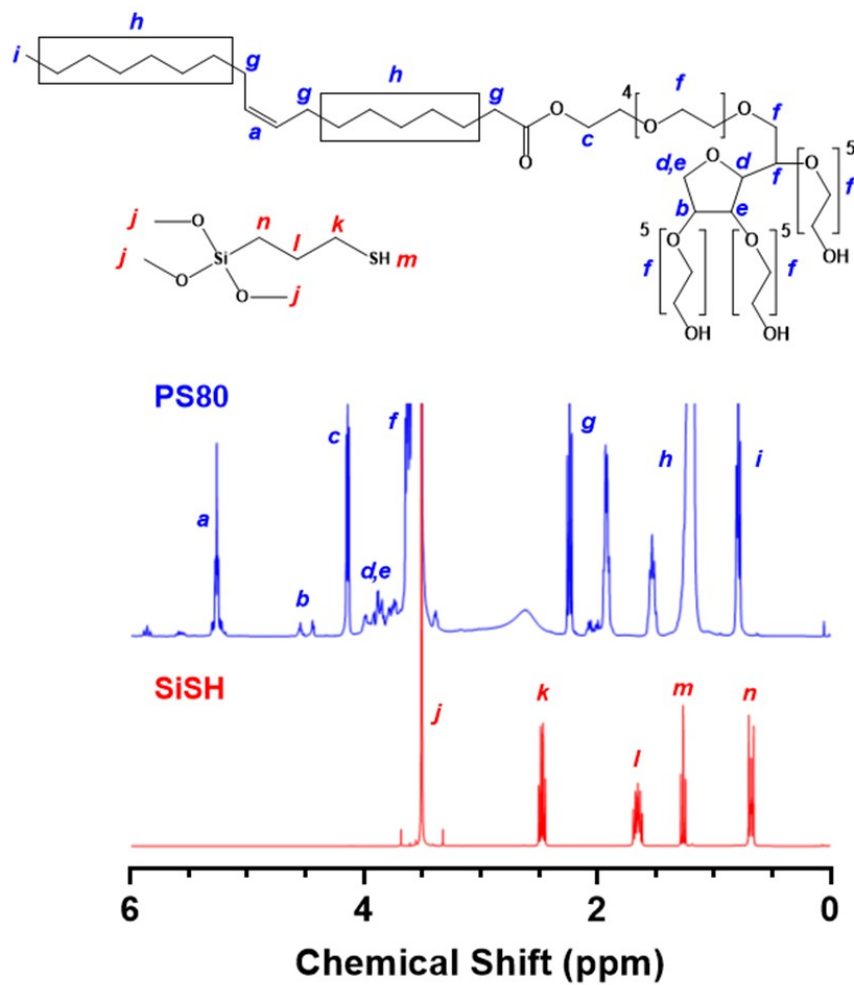

SI Figure 2.  $^1\text{H}$  NMR and structures of starting reagents SiSH and PS80 in addition to peak assignments



| Monomer                                                                                           | Thiol-to-Alkene Ratio | VA-086 conc. (wt%) | TEA conc. (wt%) | Time (hrs) | Conversion (%) |
|---------------------------------------------------------------------------------------------------|-----------------------|--------------------|-----------------|------------|----------------|
| 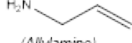<br>(Allylamine) | 0.5                   | 0.5                | 0               | 4          | 94             |
| <br>(HEMA)       | 0.5                   | 0.5                | 0               | 4          | 99             |
| <br>(DMA)        | 0.5                   | 0.5                | 0               | 4          | 99             |
| <br>(VBTA)       | 0.5                   | 0.5                | 0               | 8          | 92             |
| <br>(NaSS)       | 0.5                   | 0.5                | 0               | 8          | 93             |
| <br>(HEAc)      | 0.5                   | 0                  | 2.27            | 1          | 92             |

**SI Figure 4.** Summary of monomer conjugation trials including conditions, reactions times and conversions

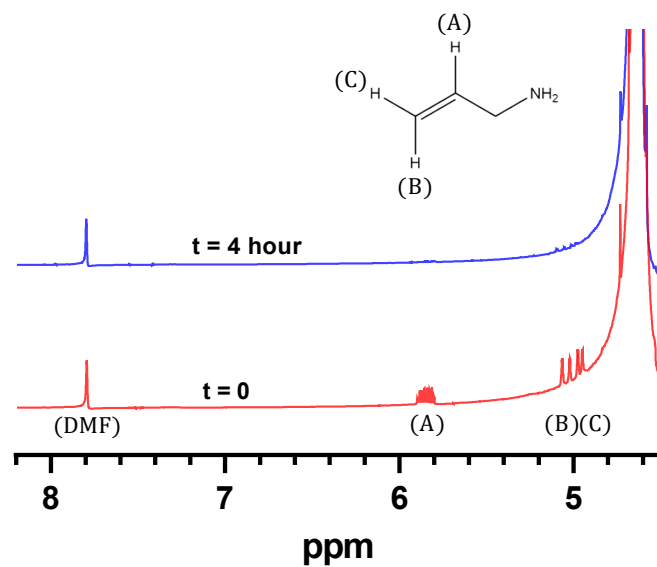

SI Figure 5. <sup>1</sup>H NMR spectra of allylamine before (red) and after (blue) thiol-ene reaction

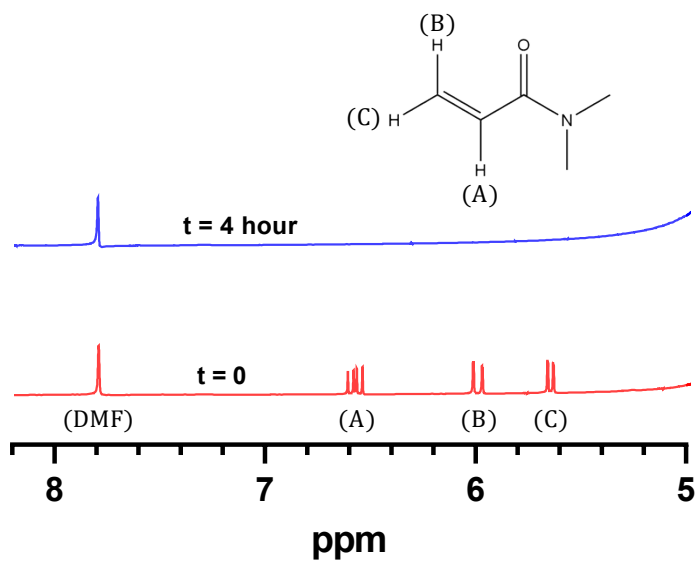

SI Figure 6. <sup>1</sup>H NMR spectra of N,N-dimethylacrylamide before (red) and after (blue) thiol-ene reaction

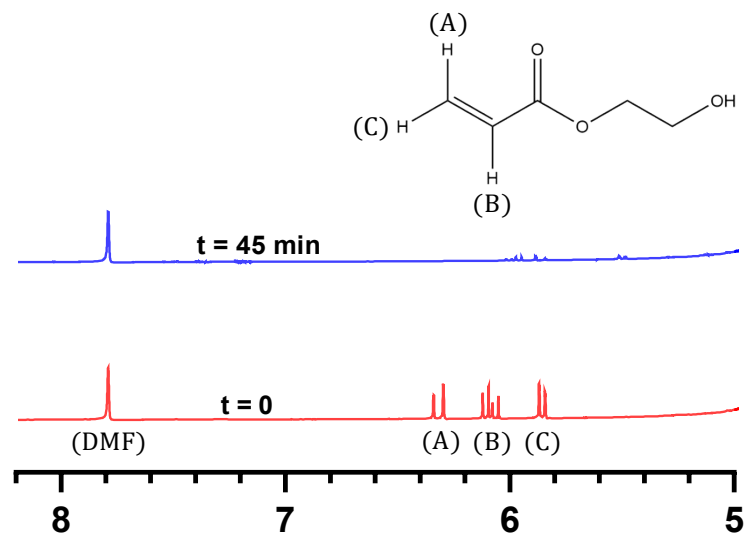

SI Figure 7.  $^1\text{H}$  NMR spectra of 2-hydroxyethyl acrylate before (red) and after (blue) thiol Michael reaction

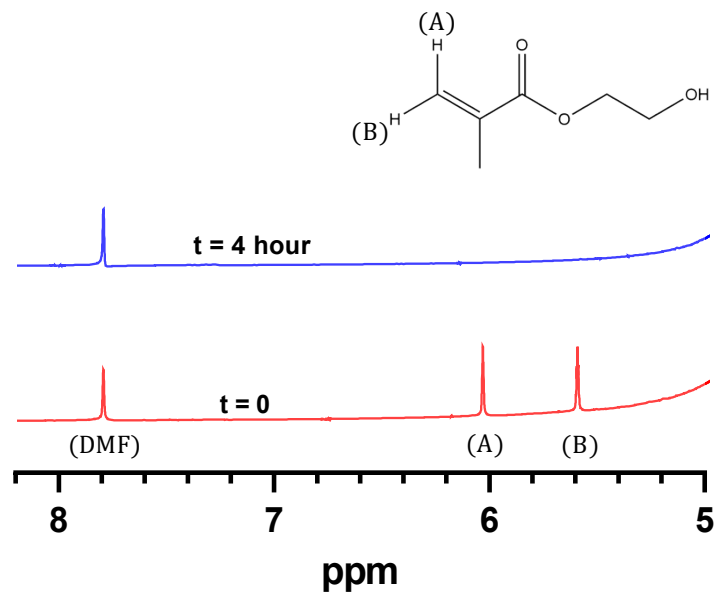

SI Figure 8.  $^1\text{H}$  NMR spectra of hydroxyethyl methacrylate before (red) and after (blue) thiol-ene reaction

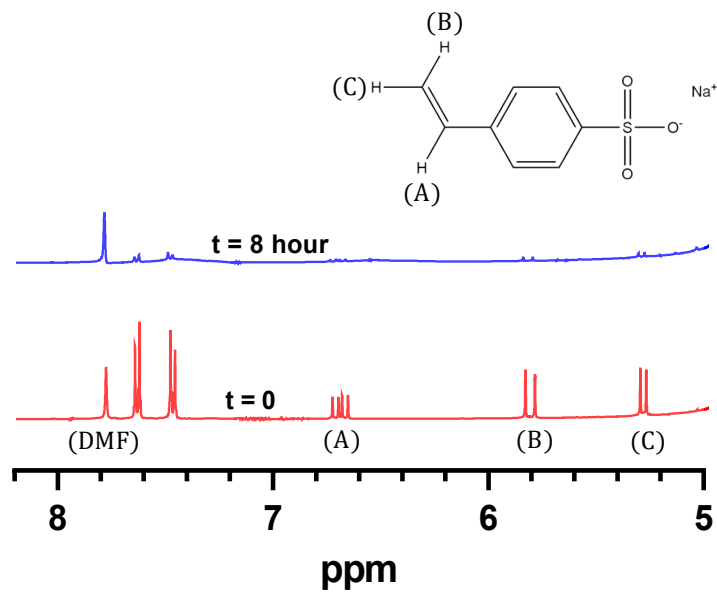

SI Figure 9.  $^1\text{H}$  NMR spectra of sodium 4-vinylbenzenesulfonate before (red) and after (blue) thiol-ene reaction

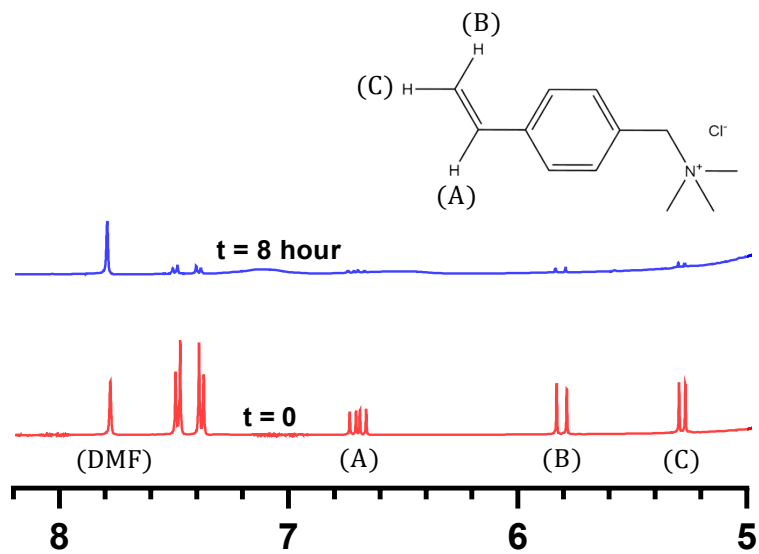

SI Figure 10.  $^1\text{H}$  NMR spectra of (vinylbenzyl)trimethylammonium chloride before (red) and after (blue) thiol-ene reaction

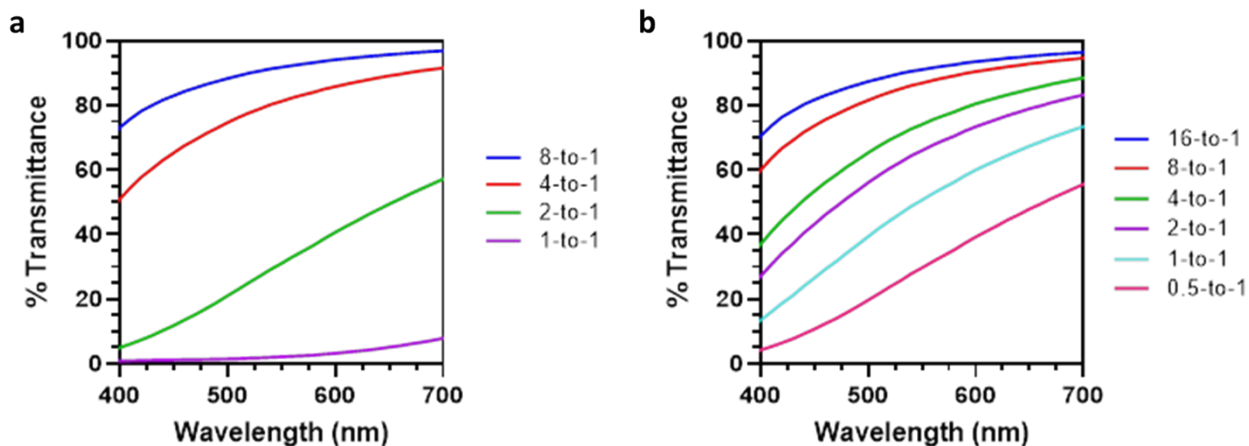

**SI Figure 11.** Change in % transmittance as a function of alkene-to-thiol ratio for resins with fixed 40 wt% PEGdMA concentration (a) and resins with fixed 50 wt% solids concentration. As the alkene-to-thiol ratio is reduced towards unity, % transmittance of light through the material over the entire visible range is reduced, indicating the material is transitioning from transparent to opaque.

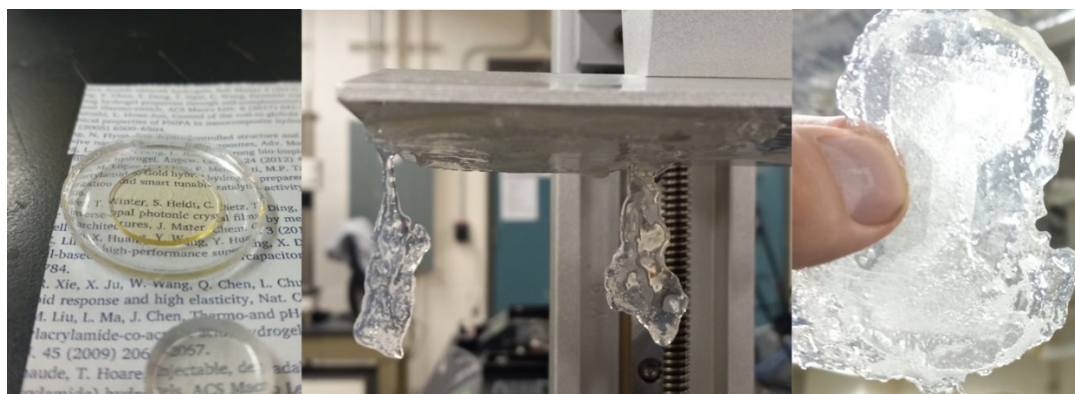

**SI Figure 12.** Curing and 3D printing of BMAP/PS80-SH resins. As shown on the left, the resins were transparent and stiff when cured in plates under UV light. However, the resin completely gelled / cured during printing as shown in the middle. On the right, the faint outline of the intended print (dogbone) could be seen under light embedded in a gel-like matrix.
